# Supplementary material
Source: publisher site journal article supplement (http://www.spandidos-publications.com/2689/downloadSupplementary)

Figure S1. (A) Relative expression of circ-TOP2A was detected by RT-qPCR following transfection in LN229 and U87MG cells. (B) Relative expression of miR-346 was detected by RT-qPCR following transfection in LN229 and U87MG cells. The data are shown as the mean  $\pm$  standard deviation (n=3). \*\*P<0.01. Circ, circRNA; RT-qPCR, reverse transcription-quantitative PCR; miR, microRNA; si, short interfering; N.S., not significant.

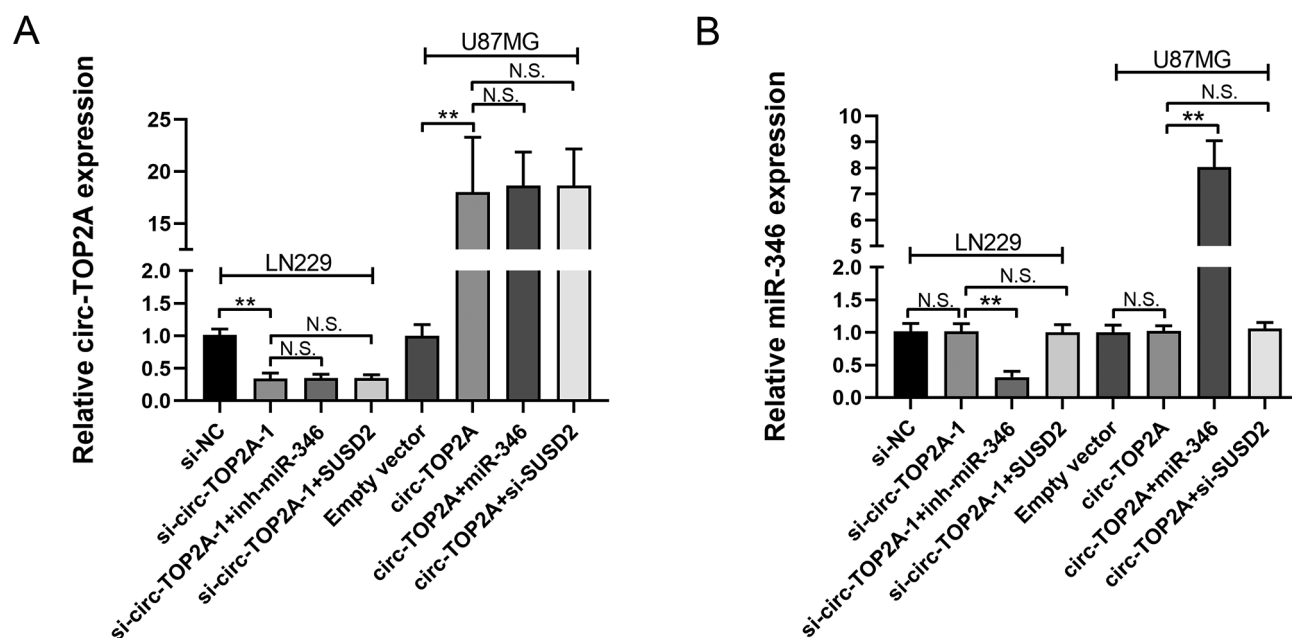

Supplement: Supplementary file 1 [file downloadSupplementary]
